# Supplementary material
Source: PubMed Central journal article supplement (PMC8516693)
Supplement: NIHMS1707153-supplement-2.pdf [file NIHMS1707153-supplement-2.pdf]

Video 1: Lightsheet Microscopy showing VRC01 antibody distribution in vaginal epithelium throughout a z-stack ImageJ reconstitution of a z stack acquired on a LaVision Lightsheet microscope. Fluorophore labeled VRC01 is depicted in red and background fluorescence is depicted in green
